# Supplementary material for: Cu2O nanorods modified by reduced graphene oxide for NH3 sensing at room temperature
Source: Royal Society of Chemistry journal article supplement (doi:10.1039/c4ta06024e), 2014-11-19
Supplement: c4ta06024e1.pdf [file c4ta06024e1.pdf]

## ***Supporting Information :***

### **Cu<sub>2</sub>O nanorods modified by reduced graphene oxide for NH<sub>3</sub> sensing at room temperature**

Hu Meng,<sup>ab</sup> Wei Yang,<sup>ac</sup> Kun Ding,<sup>a</sup> Liang Feng<sup>\*a</sup> and Yafeng Guan<sup>\*a</sup>

*a* Key Lab of Separation Science for Analytical Chemistry, Dalian Institute of Chemical Physics, Chinese Academy of Sciences,  
Dalian, Liaoning 116023, P. R. China

*b* University of Chinese Academy of Sciences, Beijing 100039

*c* Key Lab of Analytical Chemistry for Biology and Medicine (Ministry of Education), College of Chemistry and Molecular Sciences,  
Wuhan University, Wuhan 430072, P.R. China

\*Corresponding authors.

Tel/Fax: (+86)-411-84379411

E-mail: fengl@dicp.ac.cn

guanyafeng@dicp.ac.cn

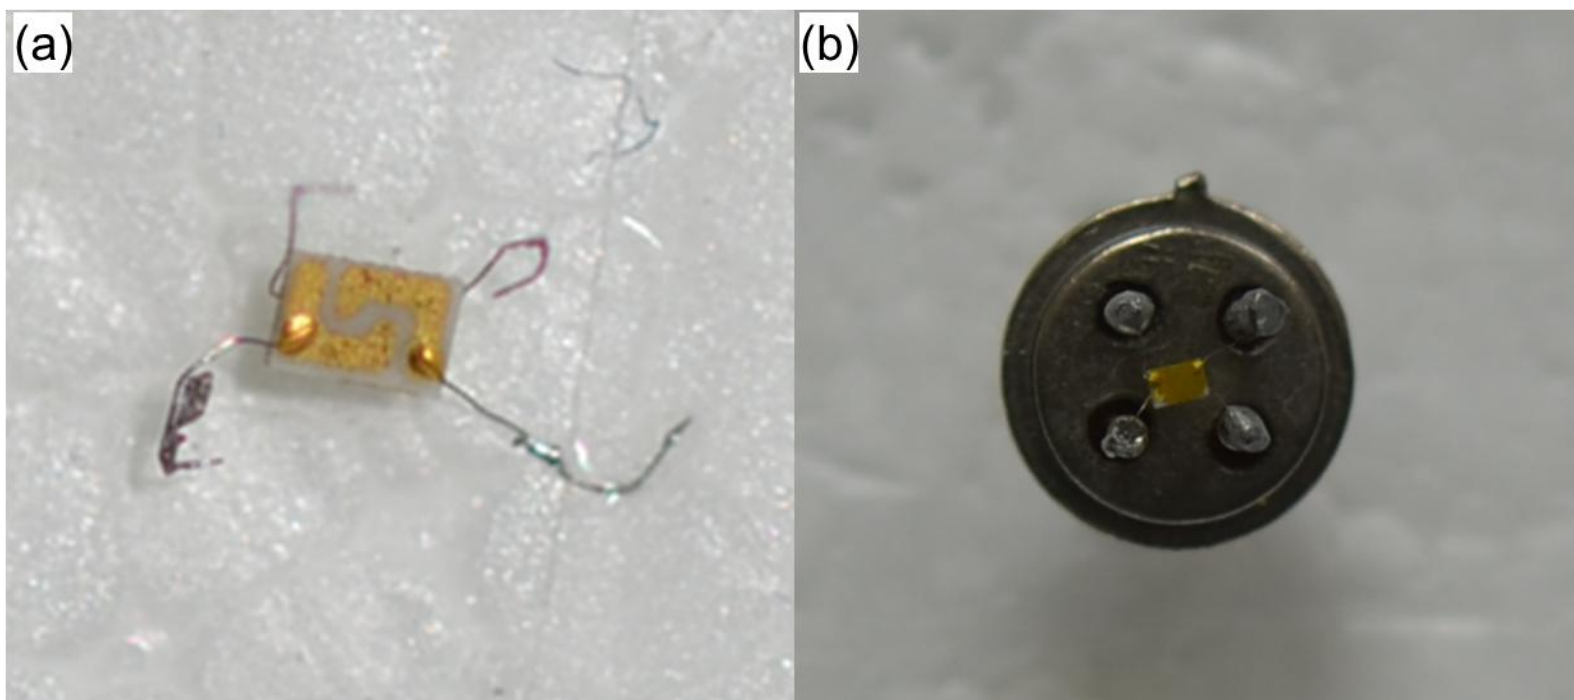

**Figure S1.** (a) Photograph of the blank sensor. (b) Photograph of the sensor coated with the sensing material.

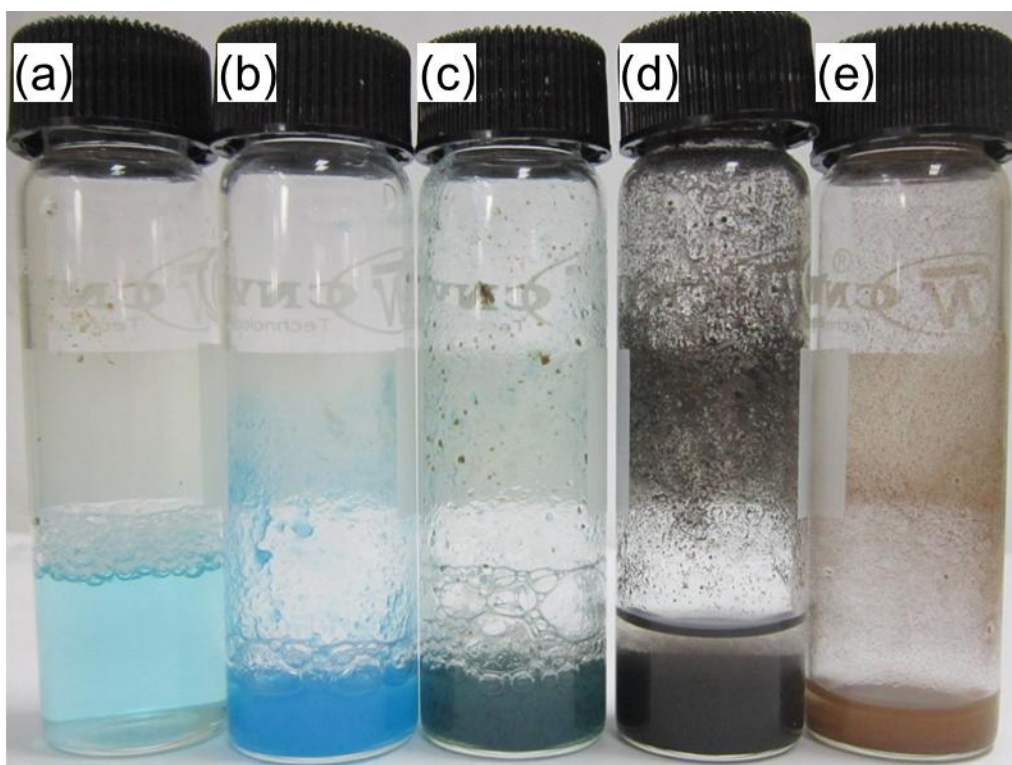

**Figure S2.** Optical images of the  $\text{CuCl}_2$  solution (a),  $\text{CuCl}_2$  solution after  $\text{NaOH}$  was added (b),  $\text{CuCl}_2$  and  $\text{NaOH}$  solution after  $\text{GO}$  was added (c),  $\text{CuO/rGO}$  composites after microwave-assisted hydrothermal reaction (d) and obtained  $\text{Cu}_2\text{O/RGO}$  composites after annealing (e).

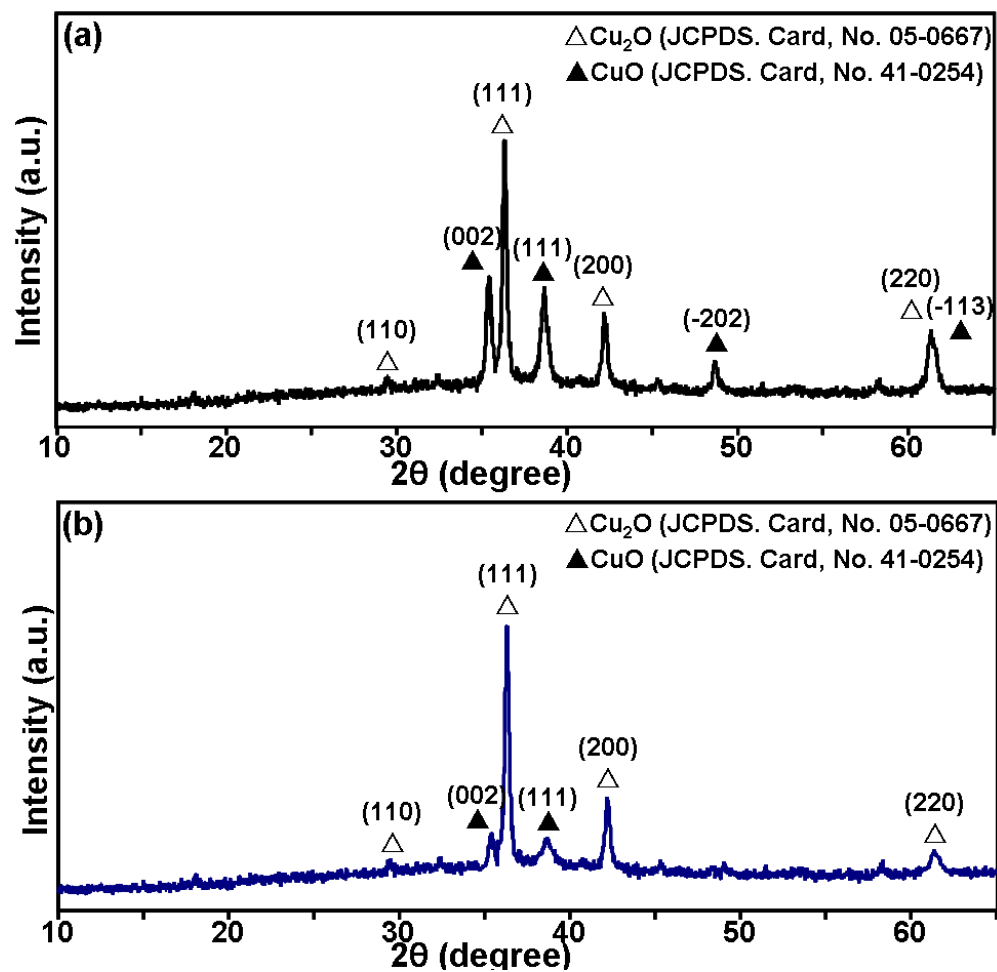

**Figure S3.** Typical XRD patterns of the products after annealing for 1 h (a) and 6 h (b) at 400 °C and under a continuous  $N_2$  flow of 100 sccm. According to the relative ratio of the diffraction intensity ( $I_{Cu_2O(111)} / (I_{CuO(111)} + I_{Cu_2O(111)})$ ), the reduction degrees of  $CuO$  were estimated as 70% and 91% (wt%) for (a) and (b), separately.

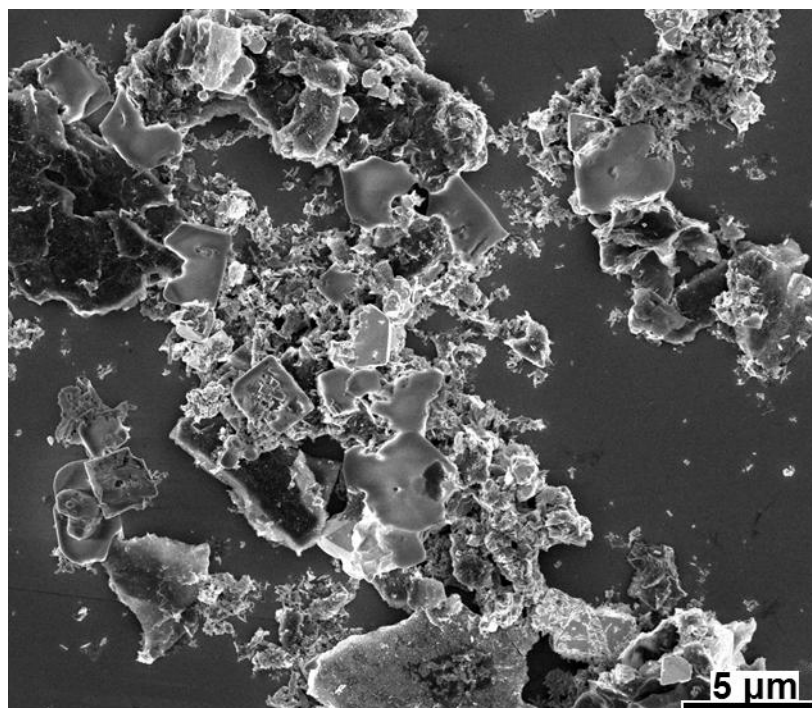

**Figure S4.** SEM images of the CuO/rGO composites after microwave-assisted hydrothermal reaction without the addition of CTAB.

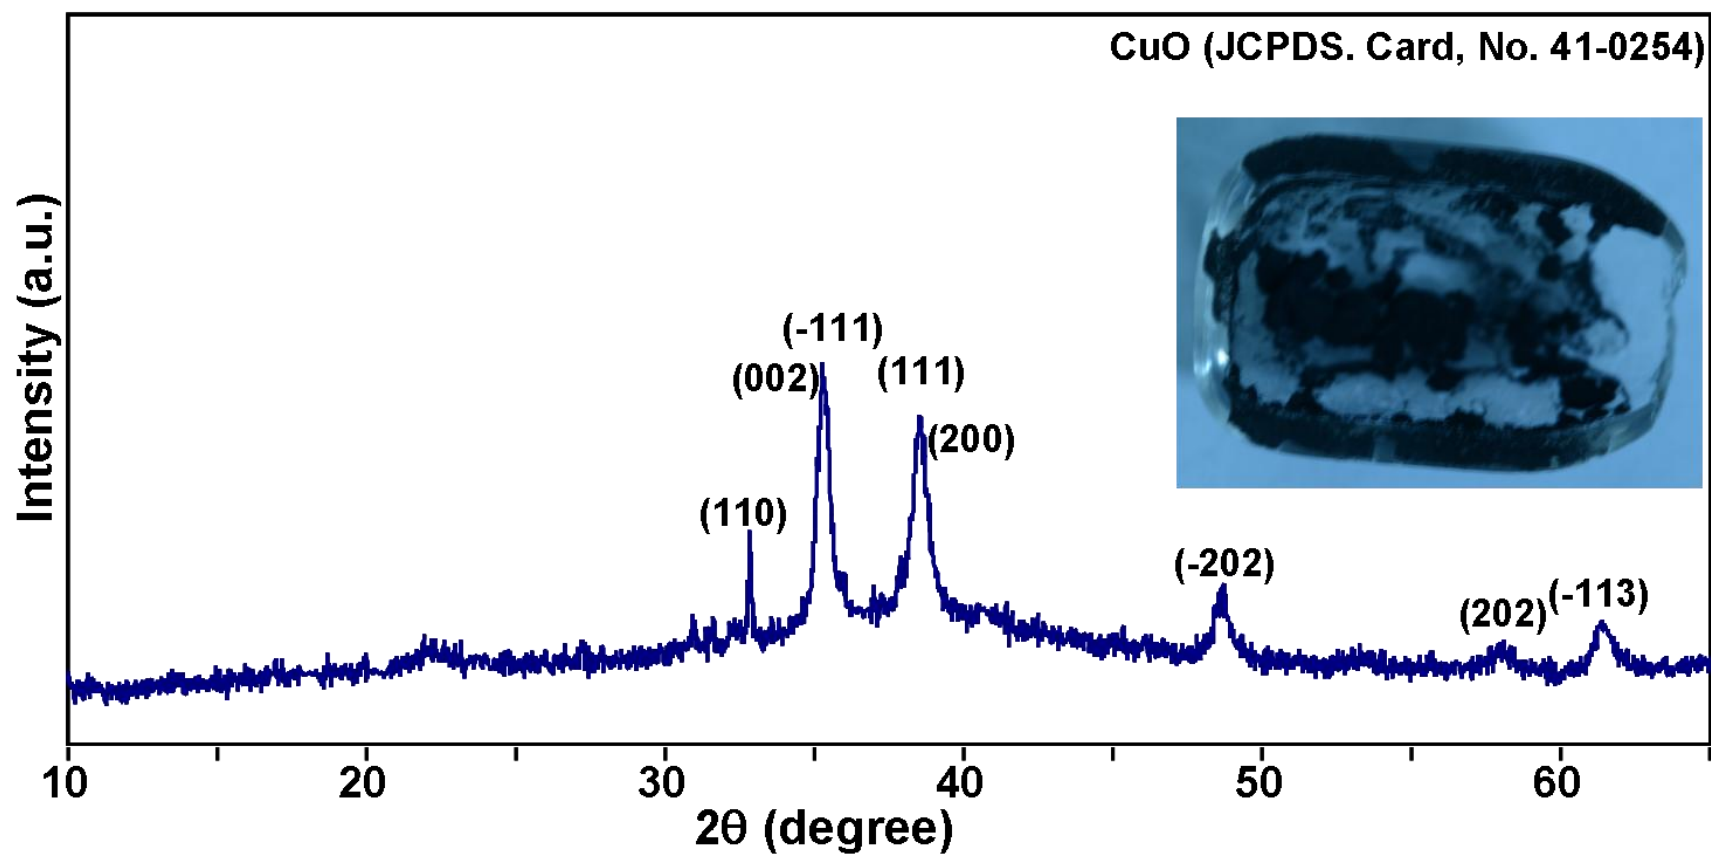

**Figure S5.** Typical XRD patterns of the products after microwave-assisted hydrothermal reaction and the annealing process without the addition of CTAB. Inset: optical image of the products after microwave-assisted hydrothermal reaction and the annealing process without the addition of CTAB.

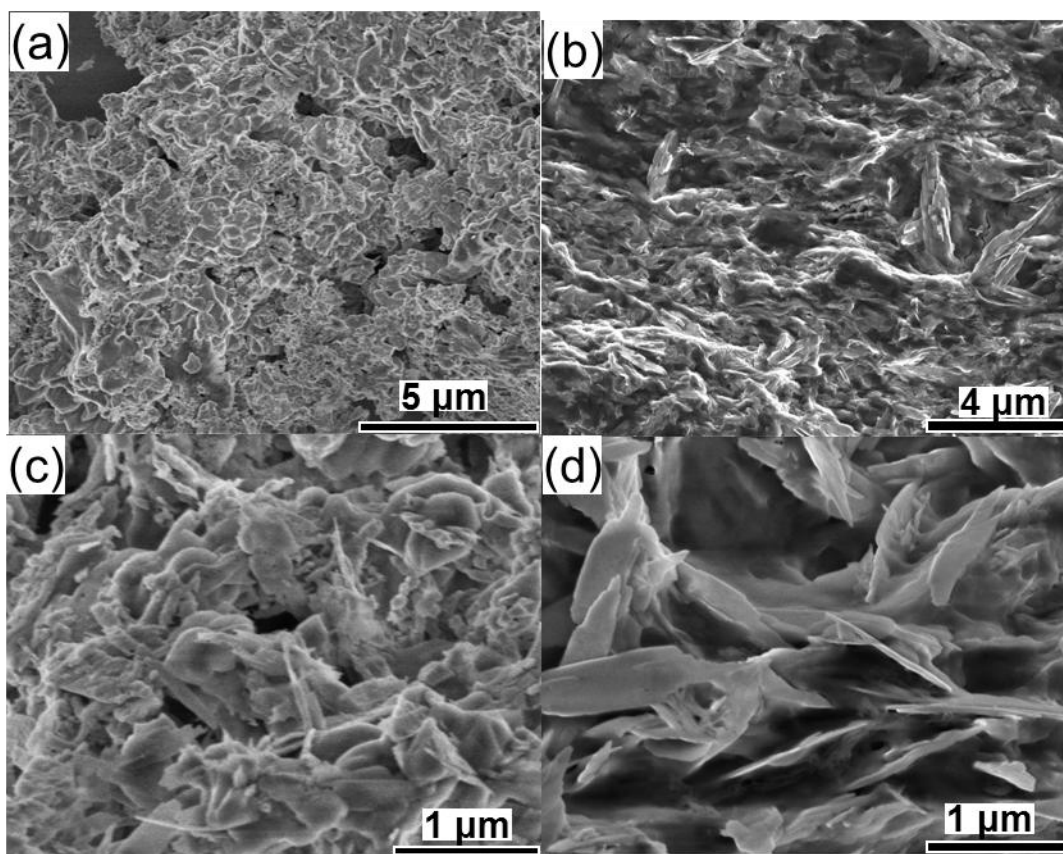

**Figure S6.** SEM images of the CuO/rGO composites after microwave-assisted hydrothermal reaction when the  $\text{CuCl}_2$  concentration decreased to 0.02 mol/L (a and c) and the following products after annealing (b and d).

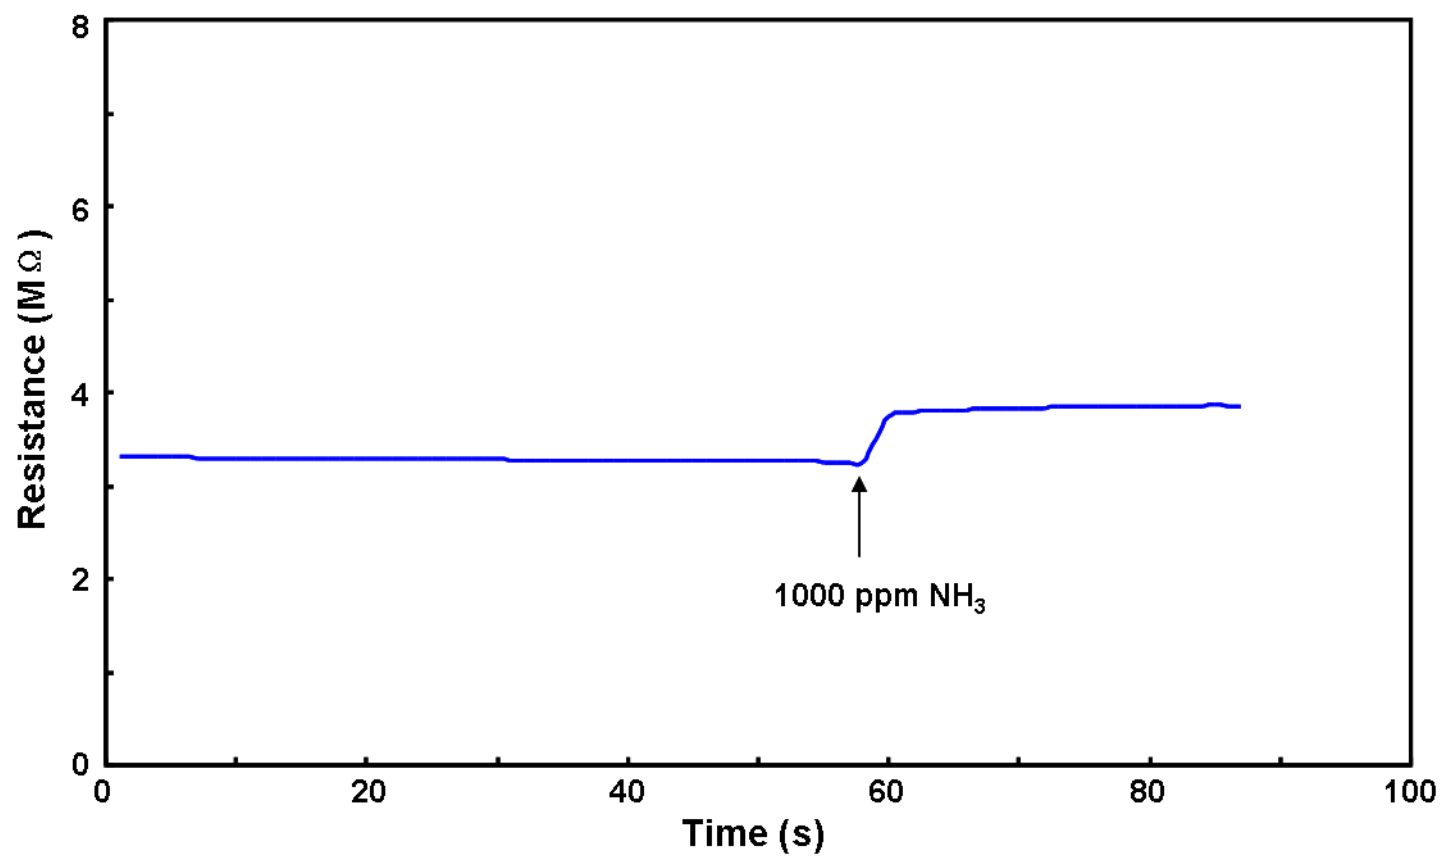

**Figure S7.** Dynamic response resistances of pure  $Cu_2O$  to 1000 ppm  $NH_3$  at 270 °C
